# Supplementary material for: Synthesis and evaluation of the targeted binding of RGD-containing PEGylated-PEI/DNA polyplex micelles as radiotracers for a tumor-targeting imaging probe
Source: Royal Society of Chemistry journal article supplement (doi:10.1039/c5ra18644g), 2015-01-01
Supplement: c5ra18644g1.pdf [file c5ra18644g1.pdf]

Supporting Information

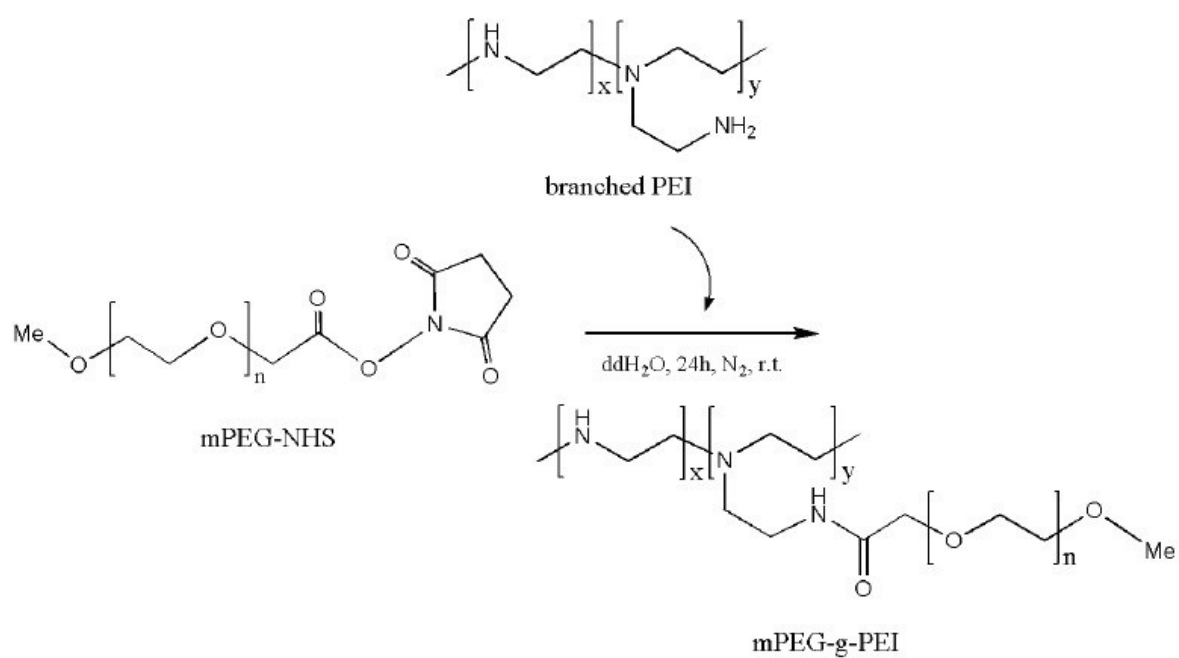

Figure S1. Schematic synthesis routs of mPEG-g-PEI (PP)

**a**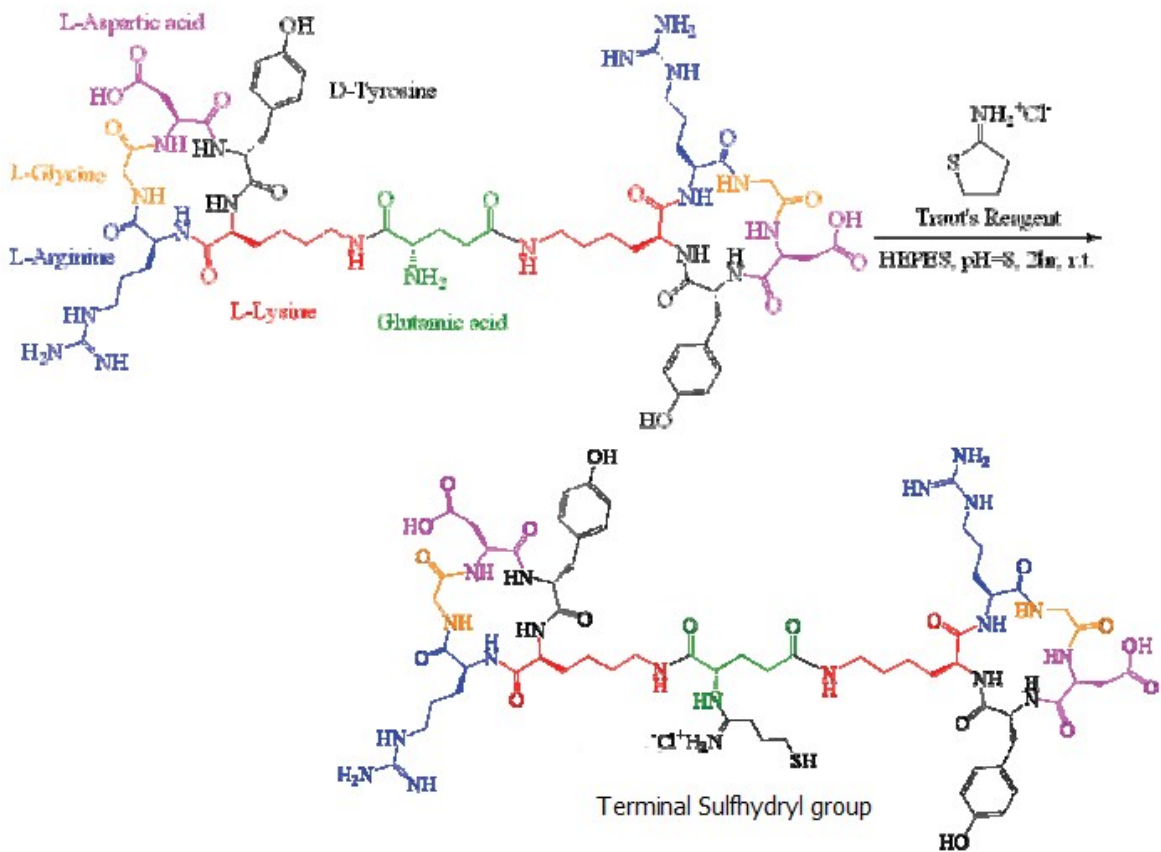**b**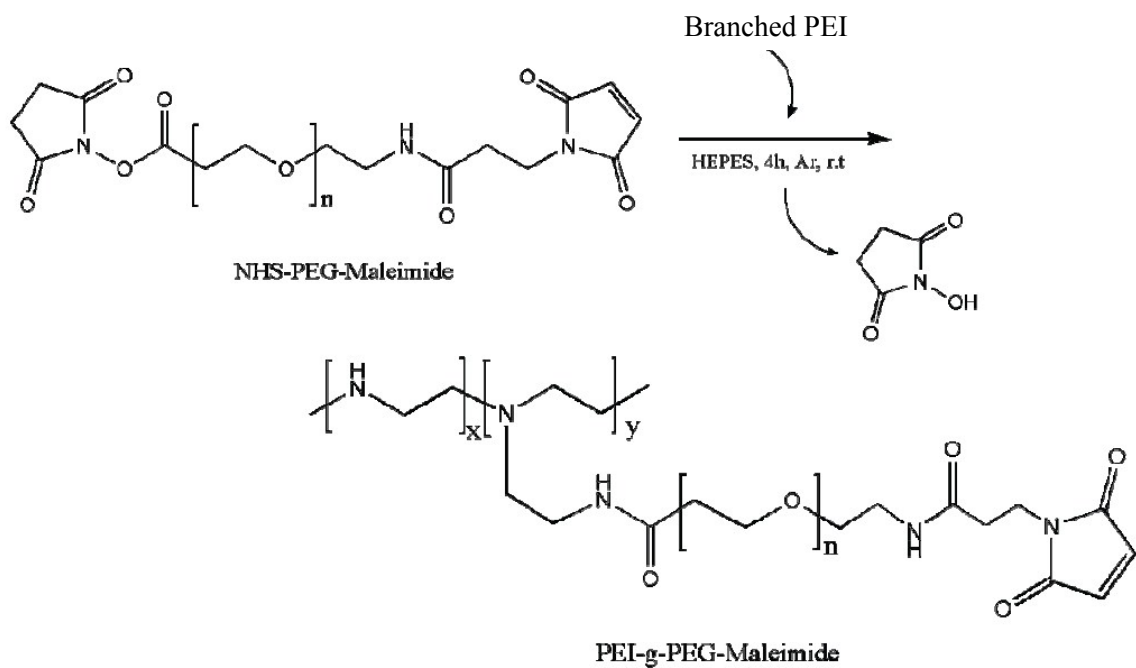

c

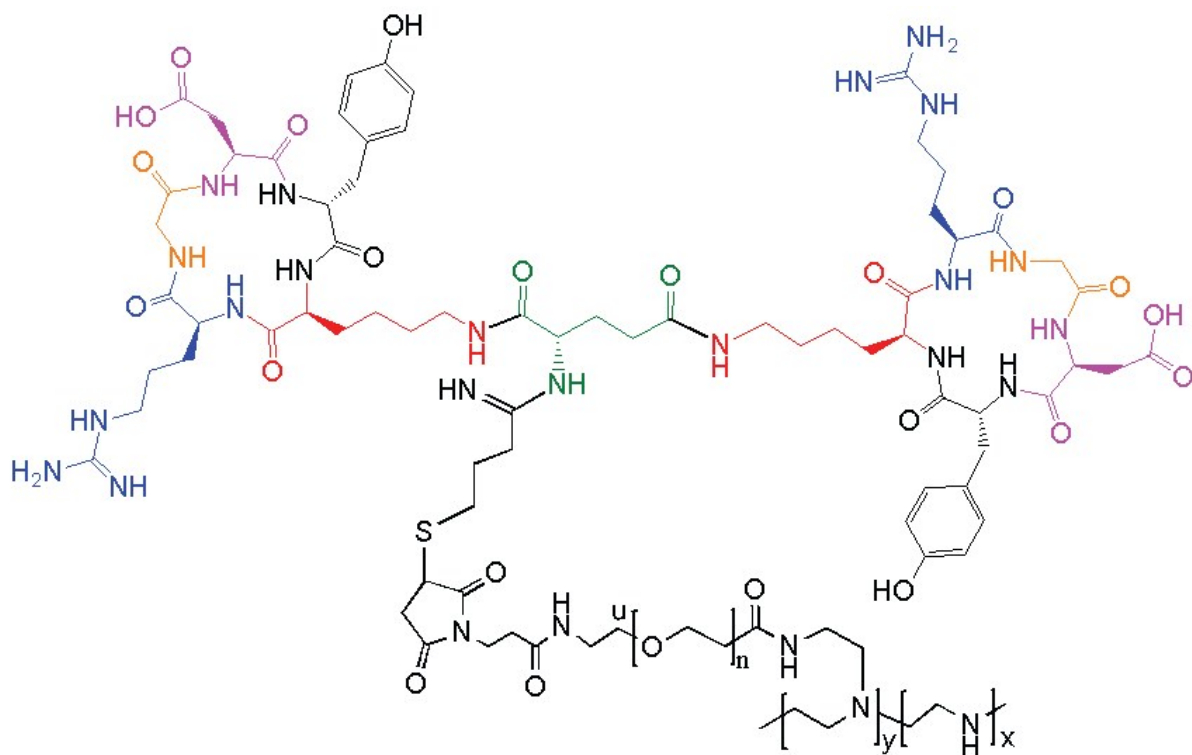

E[c(RGDyK)]<sub>2</sub>-PEG-g-PEI

Figure S2. Synthesis of E[c(RGDyK)]<sub>2</sub>-PEG-g-PEI (RPP) (a) Modify E[c(RGDyK)]<sub>2</sub> to form terminal sulfhydryl group (b) Bind NHS-PEG-MAL to branched PEI (c) Obtain the final product by mixing (a) and (b) intermediates.

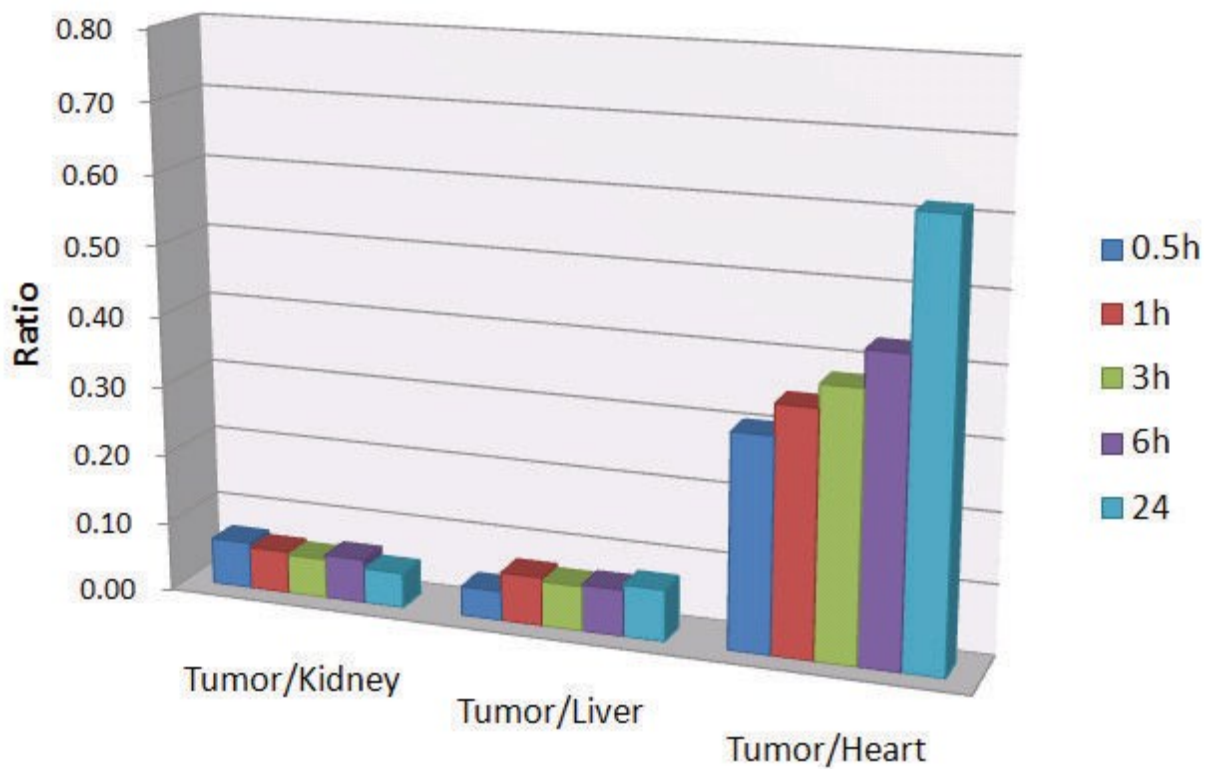

Figure S3. The tumor-to-kidney, tumor-to-liver, tumor-to-heart(blood pool) ratios for  $^{99m}\text{Tc}$ -PP10/D in female BALB/c nude mice bearing subcutaneous Hela tumors.

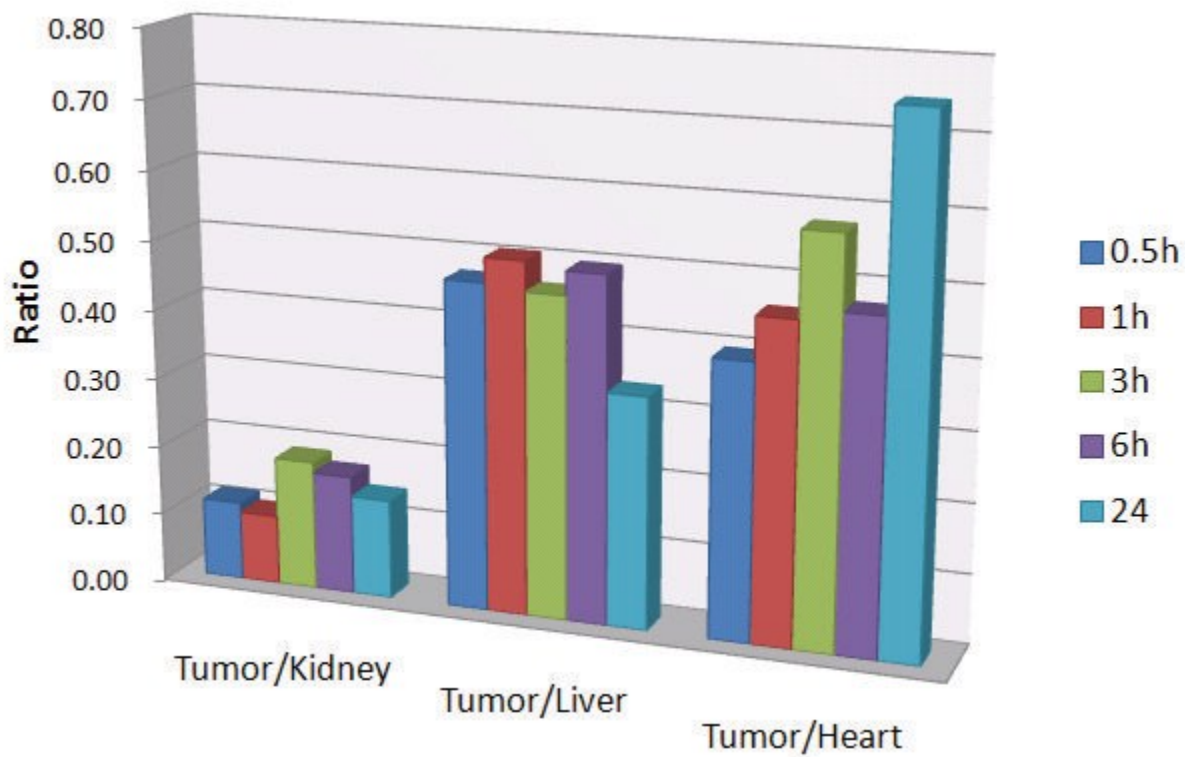

Figure S4. The tumor-to-kidney, tumor-to-liver, tumor-to-heart(blood pool) ratios for  $^{99m}\text{Tc}$ -RPP10/D in female BALB/c nude mice bearing subcutaneous Hela tumors.
